# Supplementary material for: Facile construction of dibenzodioxo[3.3.1]nonanes bearing spirocyclohexadienones via domino [4 + 2] cycloaddition/C(sp3)–H oxidative dehydrogenation coupling reactions
Source: Royal Society of Chemistry journal article supplement (doi:10.1039/d2ob01860h), 2022-01-01
Supplement: d2ob01860h1.pdf [file d2ob01860h1.pdf]

## Supporting Information

Facile construction of dibenzodioxo[3.3.1]nonanes bearing spirocyclohexadienones via domino [4+2] cycloaddition/C(sp<sup>3</sup>)-H oxidative dehydrogenation coupling reactions

Genhui Chen,<sup>†,a</sup> Hongjiao Li,<sup>†,a</sup> Guojuan Liang,<sup>a</sup> Qian Pu,<sup>a</sup> Lijuan Bai,<sup>a</sup> Dexin Zhang,<sup>a</sup> Ying Ye,<sup>a</sup>  
Yong Li,<sup>b</sup> Jing Zhou,<sup>\*,a</sup> Hui Zhou<sup>\*,a</sup>

<sup>a</sup> Chongqing Research Center for Pharmaceutical Engineering, Chongqing Key Laboratory of Biochemistry and Molecular Pharmacology, School of pharmacy, Chongqing Medical University, Chongqing 400016, China

<sup>b</sup> College of Pharmacy, National & Local Joint Engineering Research Center of Targeted and Innovative Therapeutics, IATTI, Chongqing University of Arts and Sciences, Chongqing, 402160, China

E-mail: [102792@cqmu.edu.cn](mailto:102792@cqmu.edu.cn)

### Table of Contents

|                                                                                                                                 |    |
|---------------------------------------------------------------------------------------------------------------------------------|----|
| 1. General Methods .....                                                                                                        | 2  |
| 2. Optimization of other reaction conditions .....                                                                              | 2  |
| 3. General procedure for the domino [4+2] cycloaddition/C(sp <sup>3</sup> )-H oxidative dehydrogenation coupling reactions..... | 5  |
| 4. Characterization Data .....                                                                                                  | 6  |
| 5. NMR Spectra.....                                                                                                             | 11 |
| 6. Single-Crystal X-ray Crystallography of <b>2a</b> and <b>3</b> .....                                                         | 22 |

## 1. General Methods

Various functional groups substituted ortho-hydroxyphenylsubstituted *p*-QMs **1** were prepared according to literature method<sup>1</sup>. Commercial grade solvents were dried and purified by standard procedures as specified in Purification of Laboratory Chemicals, 4th Ed (Armarego, W. L. F.; Perrin, D. D. Butterworth Heinemann: 1997). <sup>1</sup>H NMR spectra were recorded on commercial instruments (600 MHz). Chemical shifts were reported in ppm from tetramethylsilane with the solvent resonance as the internal standard (CDCl<sub>3</sub>, δ = 7.26). Spectra are reported as follows: chemical shift (δ ppm), multiplicity (s = singlet, d = doublet, t = triplet, q = quartet, m = multiplet), coupling constants (Hz), integration, and assignment. <sup>13</sup>C NMR spectra were collected on commercial instruments (150 MHz) with complete proton decoupling. Chemical shifts are reported in ppm from the tetramethylsilane with the solvent resonance as internal standard (CDCl<sub>3</sub>, δ = 77.0). Reactions were monitored by TLC and visualized with ultraviolet light. Mass spectra were recorded on Xevo G2-S QToF tandem mass spectrometer.

### References

1. K. Zhao, Y. Zhi, T. Shu, A. Valkonen, K. Rissanen, D. Enders. *Angew. Chem. Int. Ed.* **2016**, *55*, 12104-12108.

## 2. Optimization of other reaction conditions<sup>a</sup>

Table 1 ligand screening

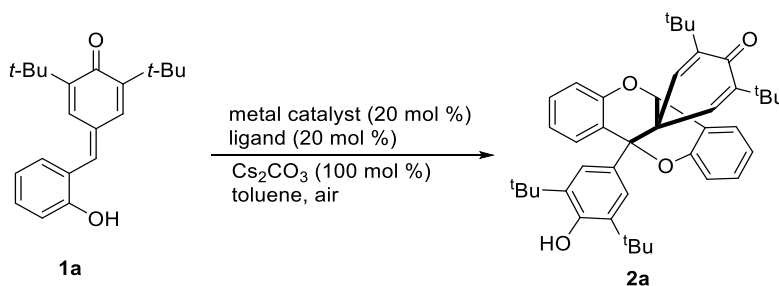

| Entry | Metal                | Ligand  | temperature | Time(h) | Yield <sup>b</sup> (%) |
|-------|----------------------|---------|-------------|---------|------------------------|
| 1     | Pd(OAc) <sub>2</sub> | —       | 100         | 12      | 89                     |
| 1     | Pd(OAc) <sub>2</sub> | BINAP   | 100         | 72      | 69                     |
| 2     | Pd(OAc) <sub>2</sub> | DPEphos | 100         | 72      | 61                     |

|   |                      |          |     |    |    |
|---|----------------------|----------|-----|----|----|
| 3 | Pd(OAc) <sub>2</sub> | dppe     | 100 | 72 | 74 |
| 4 | Pd(OAc) <sub>2</sub> | Xphos    | 100 | 96 | 74 |
| 5 | Pd(OAc) <sub>2</sub> | Xantphos | 100 | 72 | 55 |
| 6 | Pd(OAc) <sub>2</sub> | dppf     | 100 | 72 | 52 |

Table 2 base screening

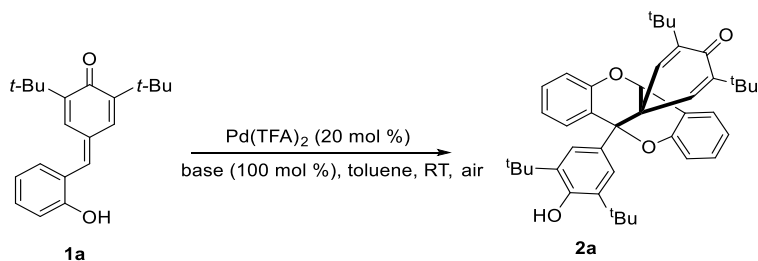

| Entry | Base                            | Time (h) | Yield <sup>b</sup> (%) |
|-------|---------------------------------|----------|------------------------|
| 1     | Na <sub>2</sub> CO <sub>3</sub> | 72       | 77                     |
| 2     | K <sub>2</sub> CO <sub>3</sub>  | 48       | 86                     |
| 3     | Cs <sub>2</sub> CO <sub>3</sub> | 48       | 98                     |
| 4     | NaOH                            | 18       | 98                     |
| 5     | KO <sup>t</sup> Bu              | 72       | 81                     |
| 6     | Et <sub>3</sub> N               | 48       | 70                     |
| 7     | DBU                             | 72       | 63                     |
| 8     | DABCO                           | 72       | 68                     |

Table 3 solvent screening

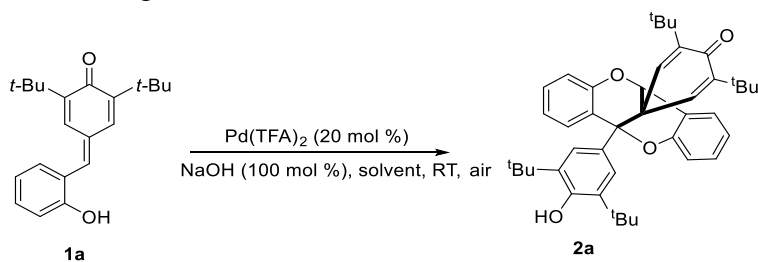

| Entry | Solvent                         | Time (h) | Yield <sup>b</sup> (%) |
|-------|---------------------------------|----------|------------------------|
| 1     | toluene                         | 18       | 98                     |
| 2     | CH <sub>2</sub> Cl <sub>2</sub> | 48       | 90                     |
| 3     | CHCl <sub>3</sub>               | 56       | 88                     |
| 4     | THF                             | 72       | 73                     |
| 5     | CH <sub>3</sub> CN              | 24       | 60                     |
| 6     | DMSO                            | 24       | 40                     |
| 7     | DMF                             | 24       | 55                     |

Table 4 metal screening

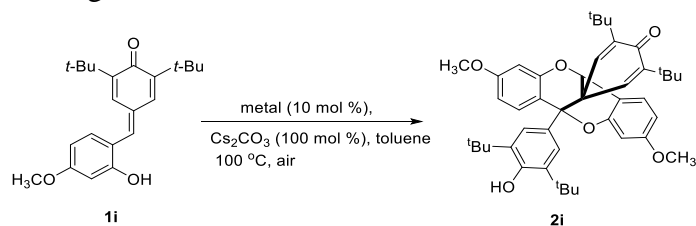

| Entry | Metal                     | Time(h) | Yield(%) |
|-------|---------------------------|---------|----------|
| 1     | $\text{Pd}(\text{OAc})_2$ | 24      | trace    |
| 2     | $\text{Pd}(\text{TFA})_2$ | 24      | trace    |
| 3     | $\text{Pd}(\text{dba})_2$ | 24      | trace    |
| 4     | $\text{BiCl}_3$           | 24      | trace    |
| 5     | $\text{Cu}(\text{OAc})_2$ | 24      | trace    |
| 6     | $\text{CuI}$              | 24      | trace    |

Table 5 base screening

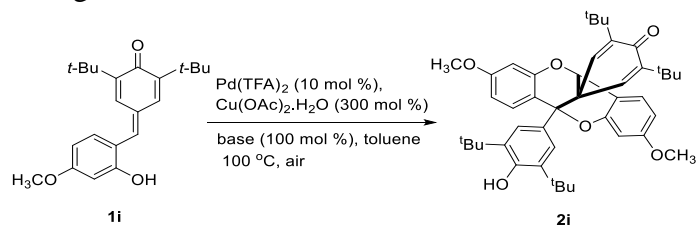

| Entry | base                     | Time(h) | Yield(%) |
|-------|--------------------------|---------|----------|
| 1     | $\text{K}_2\text{CO}_3$  | 12      | 70       |
| 2     | $\text{Na}_2\text{CO}_3$ | 12      | 70       |
| 3     | $\text{NaOH}$            | 12      | 76       |
| 4     | $\text{KO}^t\text{Bu}$   | 36      | -        |
| 5     | $\text{Et}_3\text{N}$    | 12      | 60       |
| 6     | $\text{DBU}$             | 48      | -        |
| 7     | $\text{DABCO}$           | 12      | 70       |
| 8     | $i\text{Pr}_2\text{NH}$  | 96      | -        |
| 9     | $\text{Cs}_2\text{CO}_3$ | 5       | 83       |

Table 6 temperature screening

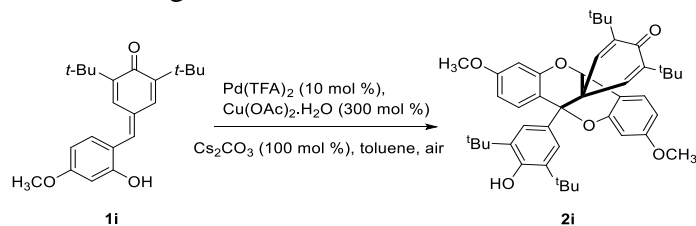

| Entry | 温度°C  | Time(h) | Yield(%) |
|-------|-------|---------|----------|
| 1     | 25°C  | 36      | trace    |
| 2     | 50°C  | 12      | 25       |
| 3     | 70°C  | 12      | 42       |
| 4     | 100°C | 5       | 83       |

Table 7 solvent screening

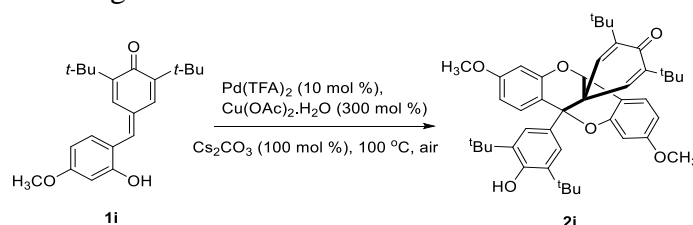

| Entry | Solvent   | Time(h) | Yield(%) |
|-------|-----------|---------|----------|
| 1     | Toluene   | 5       | 83       |
| 2     | 1, 4-二氧六环 | 24      | trace    |
| 3     | DMSO      | 8       | 40       |
| 4     | DMF       | 8       | 55       |

### 3 General procedure for the domino [4+2] cycloaddition/C(sp<sup>3</sup>)-H oxidative dehydrogenation coupling reactions.

#### Conditions A:

A solution of ortho-hydroxyphenylsubstituted *p*-QMs **1** (0.2 mmol, 1 equiv), Pd(TFA)<sub>2</sub> (0.02 mmol, 10 mol%) and NaOH (0.4 mmol, 2 equiv) in toluene (1.0 mL) was stirred under an air atmosphere at room temperature for certain time and concentrated in vacuo. The crude product was purified by column chromatography on silica gel to afford pure products **2**.

#### Conditions B:

A solution of ortho-hydroxyphenylsubstituted *p*-QMs **1** (0.2 mmol, 1 equiv), Pd(OAc)<sub>2</sub> (0.02 mmol, 10 mol%) and Cs<sub>2</sub>CO<sub>3</sub> (0.4 mmol, 2 equiv) in toluene (1.0 mL) was stirred under an air atmosphere at 100 °C for certain time and concentrated in vacuo. The crude product was purified by column chromatography on silica gel to afford pure products **2**.

### Conditions C:

A solution of ortho-hydroxyphenylsubstituted *p*-QMs **1** (0.2 mmol, 1 equiv), Pd(TFA)<sub>2</sub> (0.02 mmol, 10 mol%), 300 mol % Cu(OAc)<sub>2</sub> · H<sub>2</sub>O and Cs<sub>2</sub>CO<sub>3</sub> (0.2 mmol, 1 equiv) in toluene (1.0 mL) was stirred under an air atmosphere at 100 °C for certain time and concentrated in vacuo. The crude product was purified by column chromatography on silica gel to afford pure products **2**.

### 4. Characterization Data

*3,5-di-tert-butyl-6'-(3,5-di-tert-butyl-4-hydroxyphenyl)-6'H,12'H-spiro[cyclohexane-1,13'-[6,12]methanodibenzo[b,f][1,5]dioxocine]-2,5-dien-4-one(2a)*.

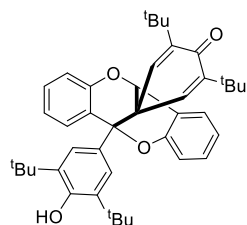

Yellow solid; 60.56 mg, 98% yield (petroleum ether/ethyl acetate =30:1); mp 239.0 °C -240.0 °C. <sup>1</sup>H NMR (CDCl<sub>3</sub>, 600 MHz) δ 1.06 (s, 18H), 1.36 (s, 18H), 4.76 (s, 1H), 5.16 (s, 1H), 6.62 (s, 1H), 6.81 (s, 1H), 6.89 (m, 2H), 6.97 (m, 2H), 7.23-7.34 (m, 6H); <sup>13</sup>C NMR (CDCl<sub>3</sub>, 150 MHz) δ 29.2, 29.3, 30.2, 34.3, 35.1, 43.2, 77.4, 82.0, 117.0, 117.2, 120.9, 128.5, 136.1, 138.7, 148.9, 150.6, 153.4, 185.2. HRMS (ESI-TOF) m/z: [M+H]<sup>+</sup> Calcd for C<sub>42</sub>H<sub>51</sub>O<sub>4</sub> 619.3787; Found 619.3782.

*3,5-di-tert-butyl-6'-(3,5-di-tert-butyl-4-hydroxyphenyl)-2',8'-difluoro-6'H,12'H-spiro[cyclohexane-1,13'-[6,12]methanodibenzo[b,f][1,5]dioxocine]-2,5-dien-4-one(2b)*.

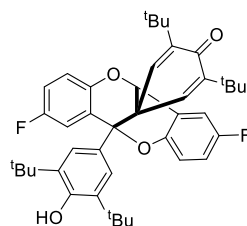

Yellow solid; 56.24 mg, 86% yield (petroleum ether/ethyl acetate =30:1); mp 273.0 °C -274.0 °C. <sup>1</sup>H NMR (CDCl<sub>3</sub>, 600 MHz) δ 1.00-1.02 (m, 18H), 1.29 (s, 18H), 4.62 (s, 1H), 5.13 (s, 1H), 6.49 (d, *J* = 3.00 Hz, 1H), 6.66 (s, 1H), 6.81 (m, 2H), 6.92 (m, 4H), 7.19 (s, 1H), 7.63 (s, 1H); <sup>13</sup>C NMR (CDCl<sub>3</sub>, 150 MHz) δ 28.2, 29.1, 33.3, 34.1, 41.7, 76.1, 81.0, 114.9, 115.8, 116.9, 117.1, 117.3, 120.5, 124.0, 126.7, 134.1, 136.7, 148.2, 148.3, 150.2, 152.6, 155.3, 155.4, 156.8, 157.0, 184.0. HRMS (ESI-TOF) m/z: [M+H]<sup>+</sup> Calcd for C<sub>42</sub>H<sub>49</sub>F<sub>2</sub>O<sub>4</sub> 655.3599; Found 655.3592.

*3,5-di-tert-butyl-2',8'-dichloro-6'-(3,5-di-tert-butyl-4-hydroxyphenyl)-6'H,12'H-spiro[cyclohexane-1,13'-[6,12]methanodibenzo[b,f][1,5]dioxocine]-2,5-dien-4-one(2c)*.

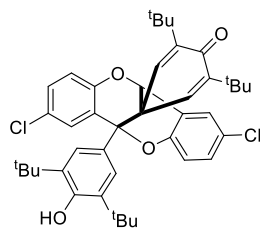

Yellow solid; 60.17 mg, 92% yield (petroleum ether/ethyl acetate =30:1); mp 226.5 °C -227.5 °C. <sup>1</sup>H NMR (CDCl<sub>3</sub>, 600 MHz) δ 1.00 (s, 18H), 1.29 (s, 18H), 4.64 (s, 1H), 5.14 (s, 1H), 6.45 (m, 2H), 6.61 (m, 1H), 6.78 (d, *J* = 8.76 Hz, 1H), 6.86 (d, *J* = 8.76 Hz, 1H), 7.09 (m, 1H), 7.13-7.15 (m, 3H), 7.19 (m, 1H); <sup>13</sup>C NMR (CDCl<sub>3</sub>, 150 MHz) δ 28.1, 28.2, 29.1, 33.3, 34.2, 41.6, 75.8, 81.1, 117.7, 117.8, 121.0, 124.3, 128.8, 133.7, 136.3, 148.5, 150.3, 150.8, 152.7, 183.9. HRMS (ESI-TOF) *m/z*: [M+H]<sup>+</sup> Calcd for C<sub>42</sub>H<sub>49</sub>F<sub>2</sub>O<sub>4</sub> 655.3599; Found 655.3592.

*2',8'-dibromo-3,5-di-tert-butyl-6'-(3,5-di-tert-butyl-4-hydroxyphenyl)-6'H,12'H-spiro[cyclohexane-1,13'-[6,12]methanodibenzo[b,f][1,5]dioxocine]-2,5-dien-4-one (2d).*

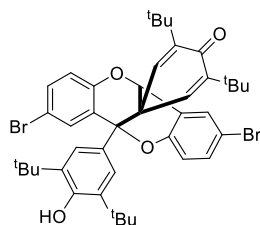

Yellow solid; 64.51 mg, 83% yield (petroleum ether/ethyl acetate =30:1); mp 229.4 °C -230.3 °C. <sup>1</sup>H NMR (CDCl<sub>3</sub>, 600 MHz) δ 1.01 (s, 18H), 1.31 (s, 18H), 4.65 (s, 1H), 5.14 (s, 1H), 6.44 (d, *J* = 2.88 Hz, 1H), 6.60 (s, 1H), 6.74 (d, *J* = 8.76 Hz, 1H), 6.82 (m, 1H), 7.19 (s, 1H), 7.23-7.31(m, 4H), 7.38 (s, 1H); <sup>13</sup>C NMR (CDCl<sub>3</sub>, 150 MHz) δ 28.1, 28.2, 29.1, 33.3, 34.2, 41.5, 75.7, 81.0, 112.4, 112.6, 118.1, 121.5, 124.8, 131.8, 132.6, 133.1, 136.2, 148.5, 150.4, 151.3, 151.4, 152.7, 183.8. HRMS (ESI-TOF) *m/z*: [M+H]<sup>+</sup> Calcd for C<sub>42</sub>H<sub>49</sub>Br<sub>2</sub>O<sub>4</sub> 777.1977; Found 777.1987.

*3,5-di-tert-butyl-6'-(3,5-di-tert-butyl-4-hydroxyphenyl)-2',8'-dimethyl-6'H,12'H-spiro[cyclohexane-1,13'-[6,12]methanodibenzo[b,f][1,5]dioxocine]-2,5-dien-4-one (2e).*

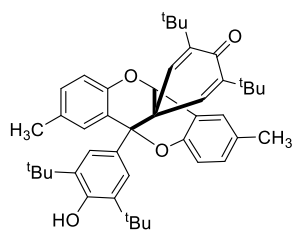

Yellow solid; 52.97 mg, 82% yield (petroleum ether/ethyl acetate =30:1); mp 260.0 °C -261.0 °C. <sup>1</sup>H NMR (CDCl<sub>3</sub>, 600 MHz) δ 1.07 (s, 18H), 1.35 (s, 18H), 2.16 (s, 3H), 2.27 (s, 3H), 4.67 (s, 1H), 5.15 (s, 1H), 6.62 (m, 2H), 6.76 (m, 2H), 6.84 (d, *J* = 8.28 Hz, 1H), 6.96 (m, 1H), 7.10 (m, 3H), 7.26 (s, 1H); <sup>13</sup>C NMR (CDCl<sub>3</sub>, 150 MHz) δ 20.5, 20.6, 29.2, 29.4, 34.3, 35.0, 43.4, 77.3, 82.0, 116.6, 116.8, 120.6, 127.6, 130.6, 136.4, 139.0, 148.7, 150.5, 151.1, 151.2, 153.3, 185.3; HRMS (ESI-TOF) *m/z*: [M+H]<sup>+</sup> Calcd for C<sub>44</sub>H<sub>55</sub>O<sub>4</sub> 647.4100; Found 647.4109.

*3,5-di-tert-butyl-6'-(3,5-di-tert-butyl-4-hydroxyphenyl)-4',10'-dimethyl-6'H,12'H-spiro[cyclohexane-1,13'-[6,12]methanodibenzo[b,f][1,5]dioxocine]-2,5-dien-4-one(2f).*

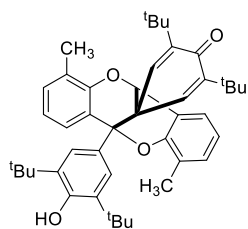

Yellow solid; 54.91 mg, 85% yield (petroleum ether/ethyl acetate =30:1); mp 251.3 °C -252.3 °C. <sup>1</sup>H NMR (CDCl<sub>3</sub>, 600 MHz) δ 1.04 (s, 9H), 1.10 (s, 9H), 1.29 (s, 9H), 1.45 (s, 9H), 2.20 (s, 3H), 2.23 (s, 3H), 4.80 (s, 1H), 5.13 (s, 1H), 6.56 (m, 2H), 6.77 (t, *J* = 7.56 Hz, 1H), 6.84 (m, 2H), 7.01 (d, *J* = 8.88 Hz, 1H), 7.05 (d, *J* = 6.66 Hz, 1H), 7.10 (d, *J* = 6.90 Hz, 1H), 7.17 (d, *J* = 6.72 Hz, 1H), 7.26 (s, 1H); <sup>13</sup>C NMR (CDCl<sub>3</sub>, 150 MHz) δ 15.9, 16.2, 29.3, 30.2, 35.0, 35.1, 43.1, 77.5, 82.0, 120.3, 120.5, 120.7, 123.6, 125.9, 126.1, 127.7, 129.0, 131.6, 136.5, 139.1, 148.8, 150.4, 151.3, 151.6, 153.2, 185.2. HRMS (ESI-TOF) *m/z*: [M+H]<sup>+</sup> Calcd for C<sub>44</sub>H<sub>55</sub>O<sub>4</sub> 647.4100; Found 647.4105.

*3,5-di-tert-butyl-6'-(3,5-di-tert-butyl-4-hydroxyphenyl)-2',8'-dimethoxy-6'H,12'H-spiro[cyclohexane-1,13'-[6,12]methanodibenzo[b,f][1,5]dioxocine]-2,5-dien-4-one(2g).*

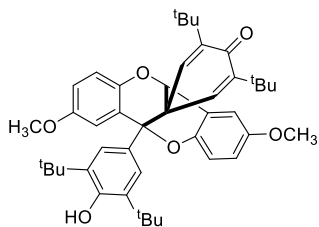

Yellow solid; 56.27 mg, 83% yield (petroleum ether/ethyl acetate =30:1); mp 251.2 °C -252.0 °C. <sup>1</sup>H NMR (CDCl<sub>3</sub>, 600 MHz) δ 1.08 (s, 18H), 1.32-1.41 (m, 18H), 3.61 (s, 3H), 3.78 (s, 3H), 4.67 (s, 1H), 5.16 (s, 1H), 6.63-6.64 (m, 2H), 6.79-6.84 (m, 5H), 6.90 (m, 1H), 7.02 (m, 1H), 7.63 (s, 1H); <sup>13</sup>C NMR (CDCl<sub>3</sub>, 150 MHz) δ 28.2, 28.3, 29.2, 33.3, 34.0, 42.3, 54.6, 76.4, 81.1, 112.9, 113.0, 116.4, 117.1, 120.3, 126.4, 127.5, 135.3, 137.8, 146.1, 146.3, 147.8, 149.6, 152.4, 152.7, 152.9, 184.2. HRMS (ESI-TOF) *m/z*: [M+H]<sup>+</sup> Calcd for C<sub>44</sub>H<sub>55</sub>O<sub>6</sub> 679.3999; Found 679.3987.

*3,5-di-tert-butyl-6'-(3,5-di-tert-butyl-4-hydroxyphenyl)-3',9'-dimethoxy-6'H,12'H-spiro[cyclohexane-1,13'-[6,12]methanodibenzo[b,f][1,5]dioxocine]-2,5-dien-4-one(2h).*

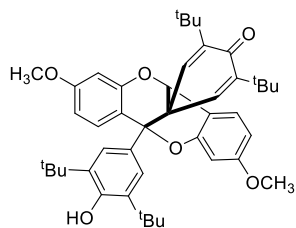

Yellow solid; 58.98 mg, 87% yield (petroleum ether/ethyl acetate =30:1); mp 245.1 °C -246.2 °C. <sup>1</sup>H NMR (CDCl<sub>3</sub>, 600 MHz) δ 1.07 (s, 18H), 1.37 (s, 18H), 3.76 (s, 6H), 4.70 (s, 1H), 5.14 (s, 1H), 6.38 (s, 1H), 6.48-6.54 (m, 3H), 6.61 (s,



1H), 6.79 (s, 1H), 7.06 (d,  $J = 8.82$  Hz, 1H), 7.21-7.23 (m, 2H), 7.53 (m, 1H);  $^{13}\text{C}$  NMR ( $\text{CDCl}_3$ , 150 MHz)  $\delta$  28.2, 29.2, 33.3, 34.0, 42.4, 54.2, 54.3, 76.4, 81.2, 100.1, 100.4, 107.5, 112.6, 115.2, 126.0, 127.6, 129.9, 131.3, 134.0, 134.7, 135.4, 138.0, 147.7, 149.4, 152.3, 153.6, 160.0, 160.5, 184.2. HRMS (ESI-TOF)  $m/z$ :  $[\text{M}+\text{H}]^+$  Calcd for  $\text{C}_{44}\text{H}_{55}\text{O}_6$  679.3999; Found 679.3989.

*3',9'-dibromo-3,5-di-tert-butyl-6'-(3,5-di-tert-butyl-4-hydroxyphenyl)-6'H,12'H-spiro[cyclohexane-1,13'-[6,12]methanodibenzo[b,f][1,5]dioxocine]-2,5-dien-4-one(2i)*.

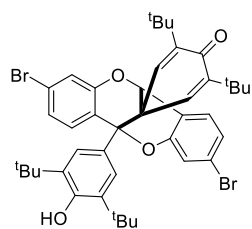

Yellow solid; 69.84 mg, 90% yield (petroleum ether/ethyl acetate =30:1); mp 250.4 °C -251.0 °C.  $^1\text{H}$  NMR ( $\text{CDCl}_3$ , 600 MHz)  $\delta$  1.06-1.10 (m, 18H), 1.26-1.38 (m, 18H), 4.73 (s, 1H), 5.19 (s, 1H), 6.50 (s, 1H), 6.71 (s, 1H), 7.04 (s, 2H), 7.07 (s, 1H), 7.11-7.12 (m, 1H), 7.13 (s, 1H), 7.19 (d,  $J = 8.16$  Hz, 1H), 7.26 (s, 2H);  $^{13}\text{C}$  NMR ( $\text{CDCl}_3$ , 150 MHz)  $\delta$  29.2, 29.3, 30.2, 34.3, 35.2, 42.8, 77.1, 82.2, 119.7, 120.3, 120.5, 123.0, 123.9, 124.3, 124.7, 125.1, 127.4, 131.5, 132.8, 134.8, 137.5, 149.5, 151.3, 153.7, 154.1, 184.9. HRMS (ESI-TOF)  $m/z$ :  $[\text{M}+\text{H}]^+$  Calcd for  $\text{C}_{42}\text{H}_{49}\text{Br}_2\text{O}_4$  777.1977; Found 777.1989.

*3,5-di-tert-butyl-2',4',8',10'-tetrachloro-6'-(3,5-di-tert-butyl-4-hydroxyphenyl)-6'H,12'H-spiro[cyclohexane-1,13'-[6,12]methanodibenzo[b,f][1,5]dioxocine]-2,5-dien-4-one (2j)*.

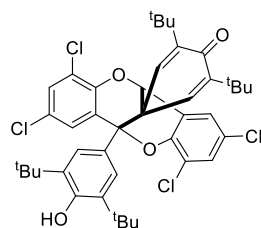

Yellow solid; 69.55 mg, 92% yield (petroleum ether/ethyl acetate =30:1); mp 261.2 °C -262.2 °C.  $^1\text{H}$  NMR ( $\text{CDCl}_3$ , 600 MHz)  $\delta$  1.05-1.10 (m, 18H), 1.30-1.45 (m, 18H), 4.88 (s, 1H), 5.24 (s, 1H), 6.37 (s, 1H), 6.49-6.52 (m, 1H), 6.63 (s, 1H), 6.94-7.14 (m, 2H), 7.30-7.41 (m, 3H);  $^{13}\text{C}$  NMR ( $\text{CDCl}_3$ , 150 MHz)  $\delta$  29.2, 30.1, 34.3, 35.3, 42.1, 77.1, 82.7, 122.5, 123.0, 123.1, 124.8, 126.4, 126.6, 128.5, 129.7, 131.3, 131.7, 133.5, 135.9, 147.7, 147.9, 150.3, 152.0, 154.0, 184.6. HRMS (ESI-TOF)  $m/z$ :  $[\text{M}+\text{H}]^+$  Calcd for  $\text{C}_{42}\text{H}_{47}\text{Cl}_4\text{O}_4$  757.2199; Found 757.2193.

*3,3',5,5'-tetra-tert-butyl-[1,1'-bi(cyclohexylidene)]-2,2',5,5'-tetraene-4,4'-dione(3)*

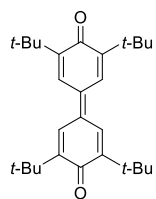

Yellow solid; mp 243.0 °C-244.0 °C.  $^1\text{H}$  NMR ( $\text{CDCl}_3$ , 600 MHz)  $\delta$  1.21 (s, 36H), 6.44 (s, 4H);  $^{13}\text{C}$  NMR ( $\text{CDCl}_3$ , 150 MHz)  $\delta$  28.4, 28.6, 34.6, 35.0, 125.0, 129.1, 149.4, 156.9, 186.8, 188.1; HRMS (ESI-TOF)  $m/z$ :  $[\text{M}+\text{H}]^+$  Calcd for  $\text{C}_{28}\text{H}_{41}\text{O}_2$  409.3107; Found 409.3100.

## 5. NMR Spectra

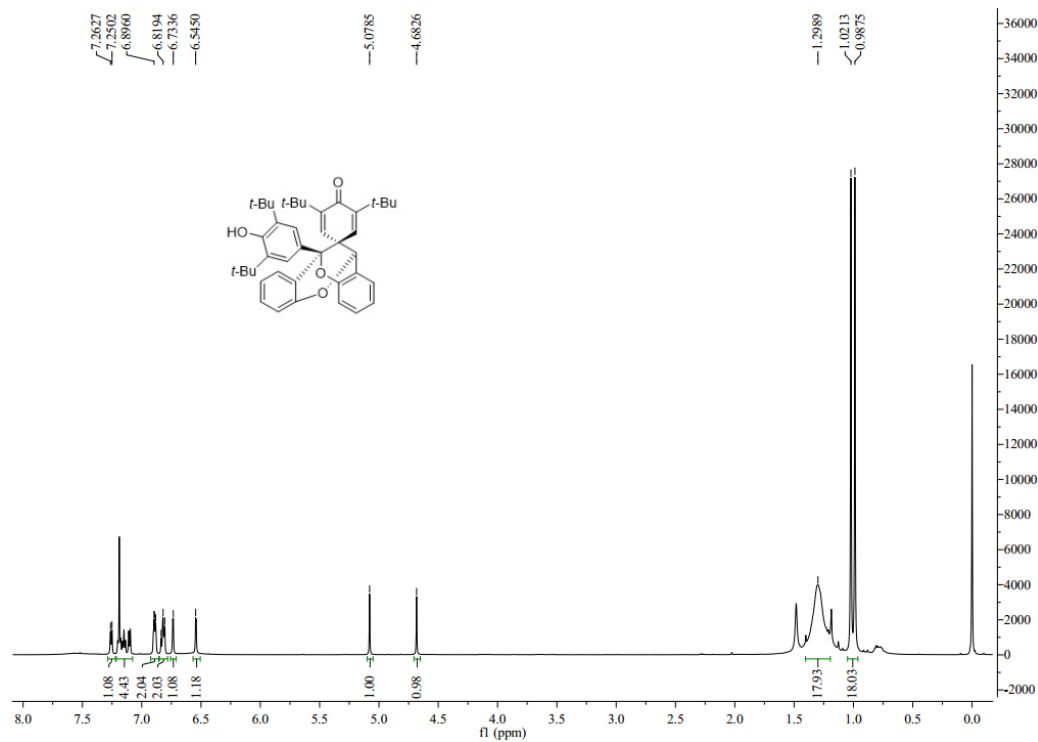

<sup>1</sup>H NMR Spectrum of **2a** (CDCl<sub>3</sub>, 600 MHz)

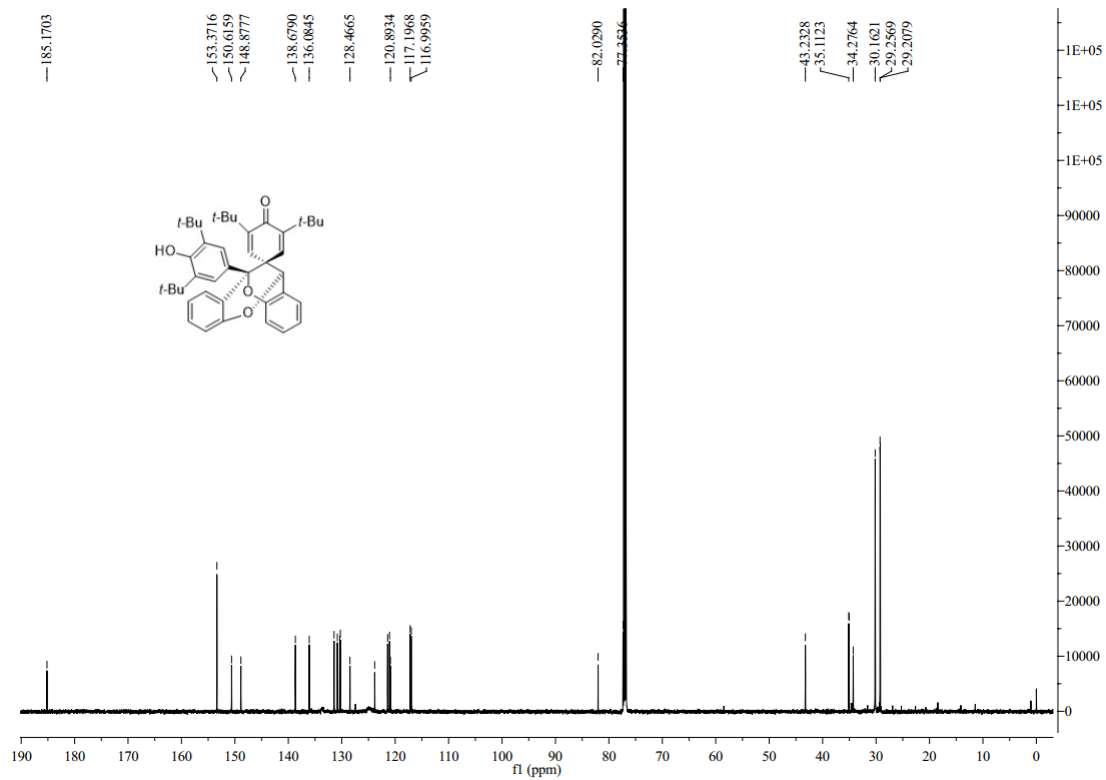

<sup>13</sup>C NMR Spectrum of **2a** (CDCl<sub>3</sub>, 600 MHz)

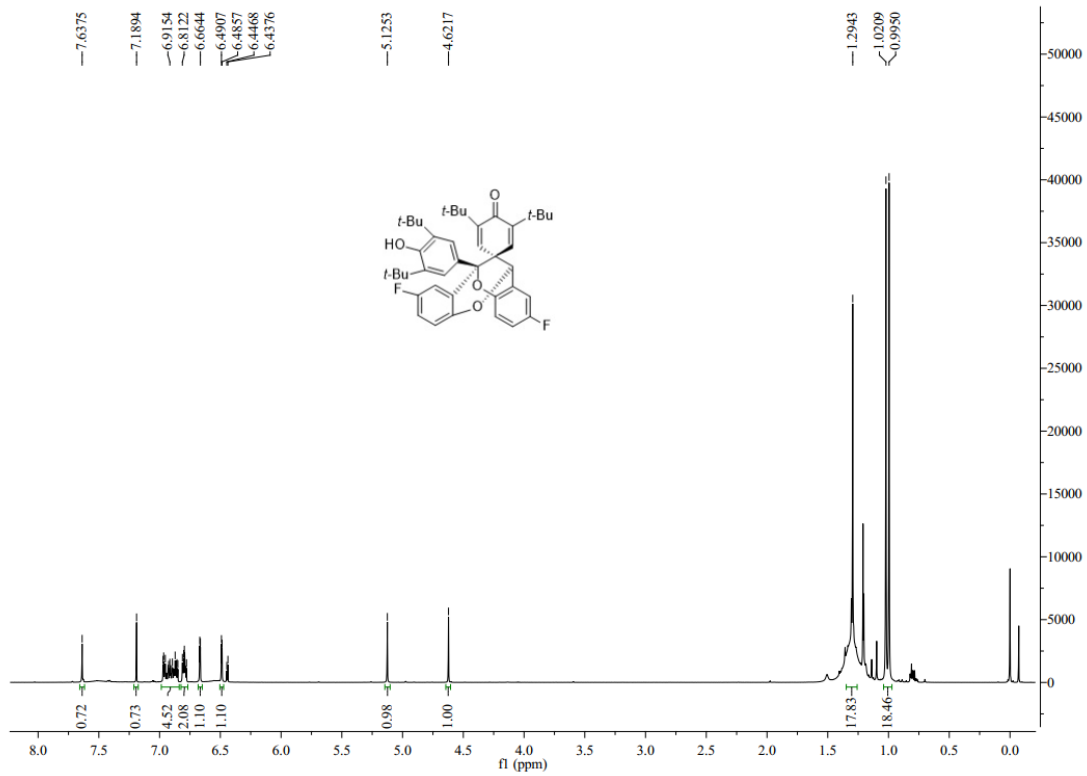

**<sup>1</sup>H NMR Spectrum of 2b (CDCl<sub>3</sub>, 600 MHz)**

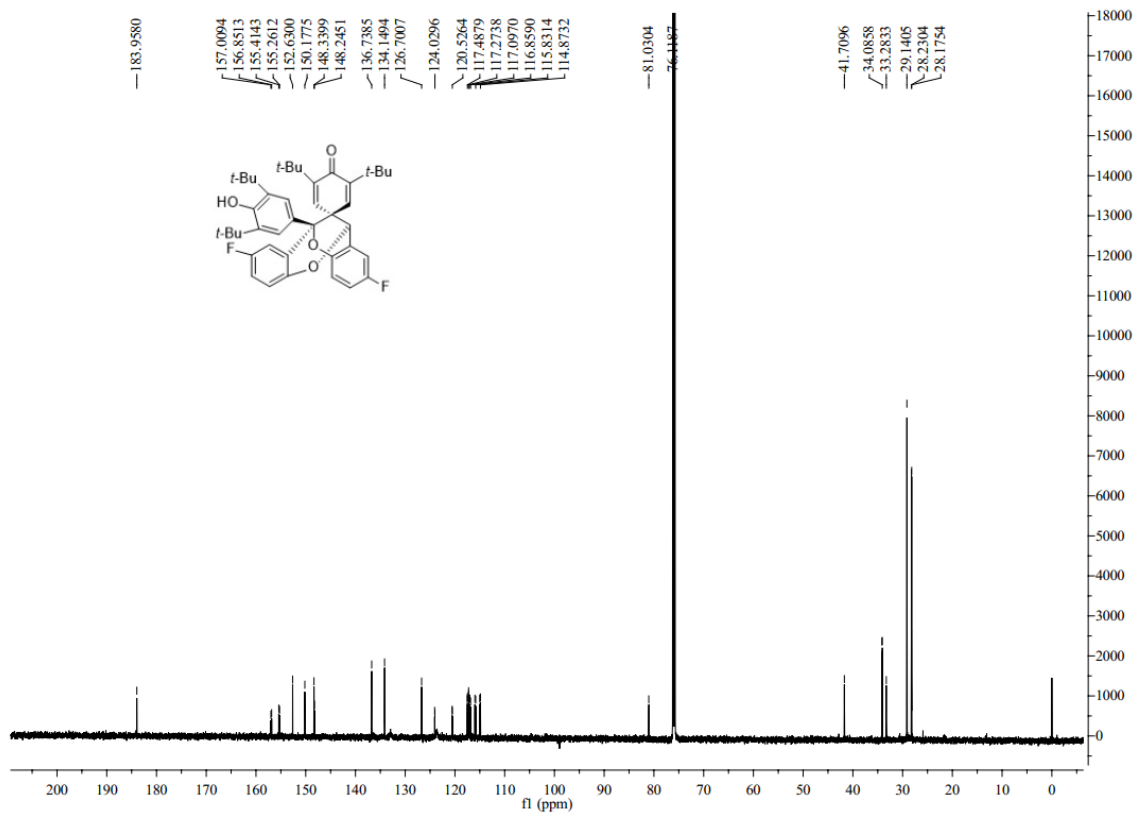

**<sup>13</sup>C NMR Spectrum of 2b (CDCl<sub>3</sub>, 600 MHz)**

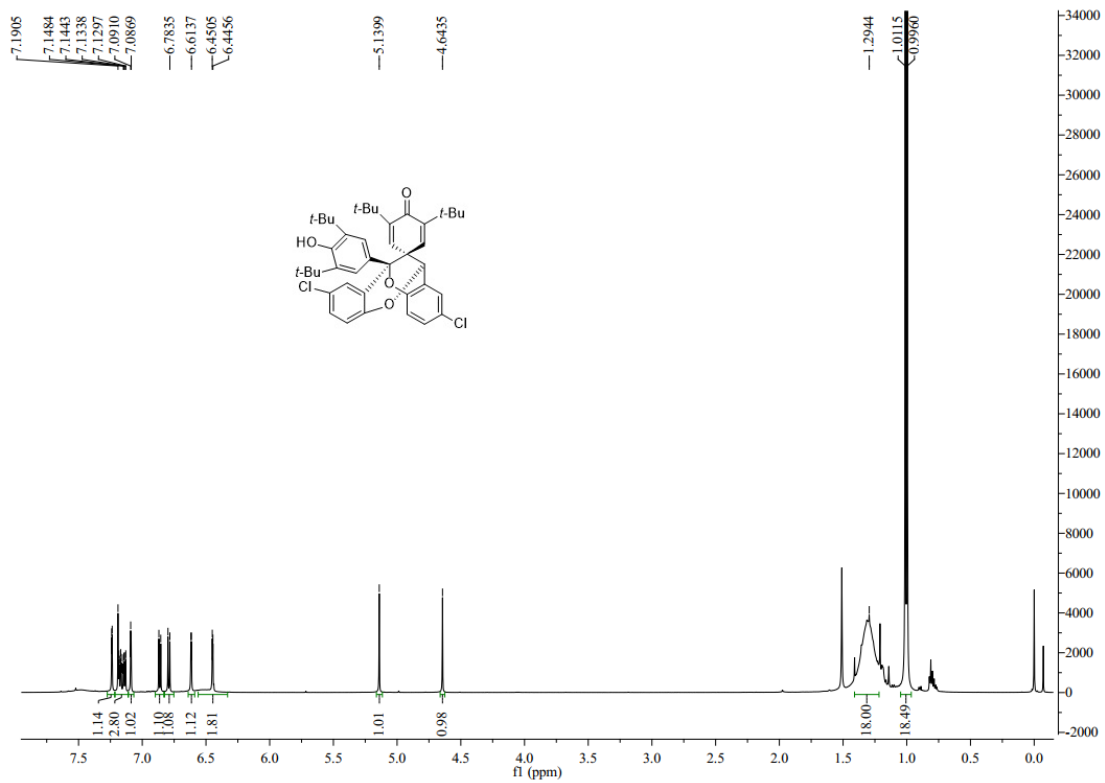

**<sup>1</sup>H NMR Spectrum of 2c (CDCl<sub>3</sub>, 600 MHz)**

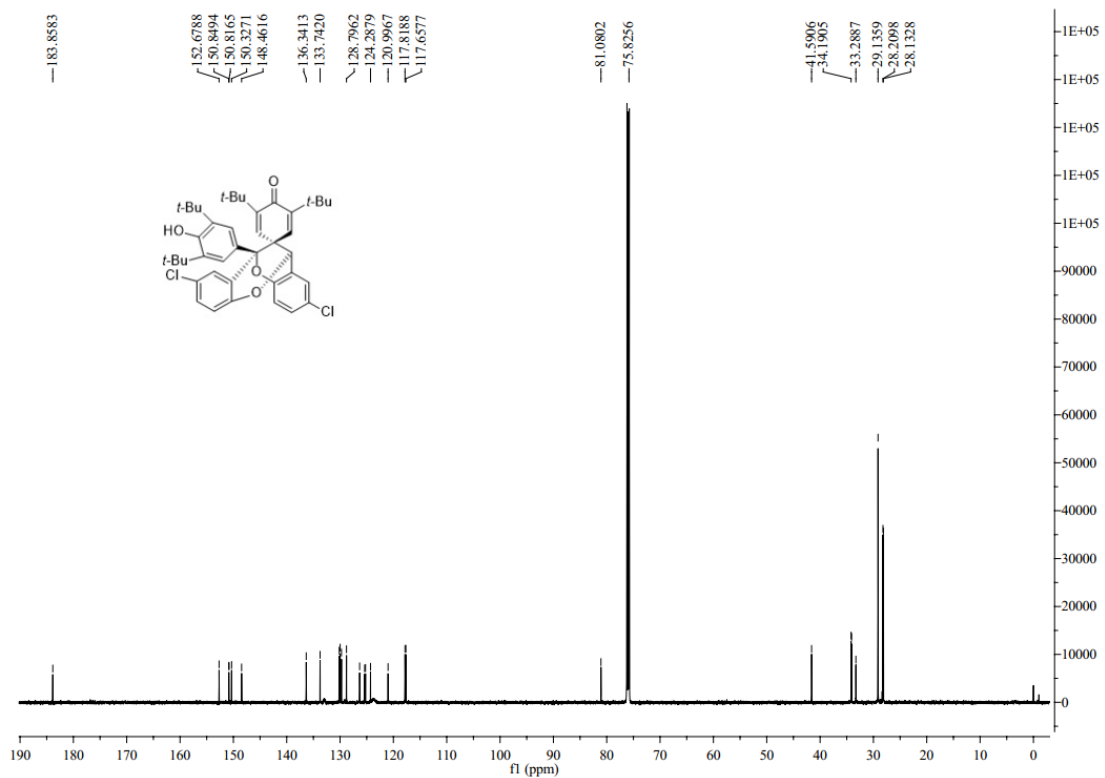

**<sup>13</sup>C NMR Spectrum of 2c (CDCl<sub>3</sub>, 600 MHz)**

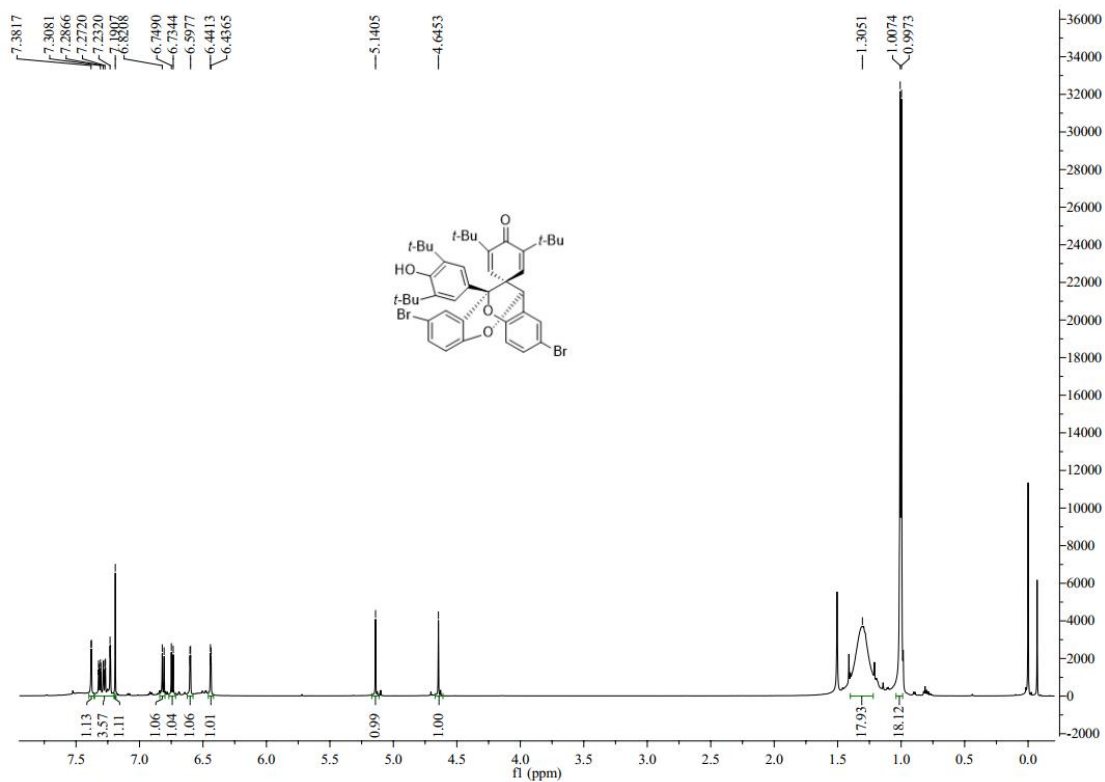

**<sup>1</sup>H NMR Spectrum of 2d (CDCl<sub>3</sub>, 600 MHz)**

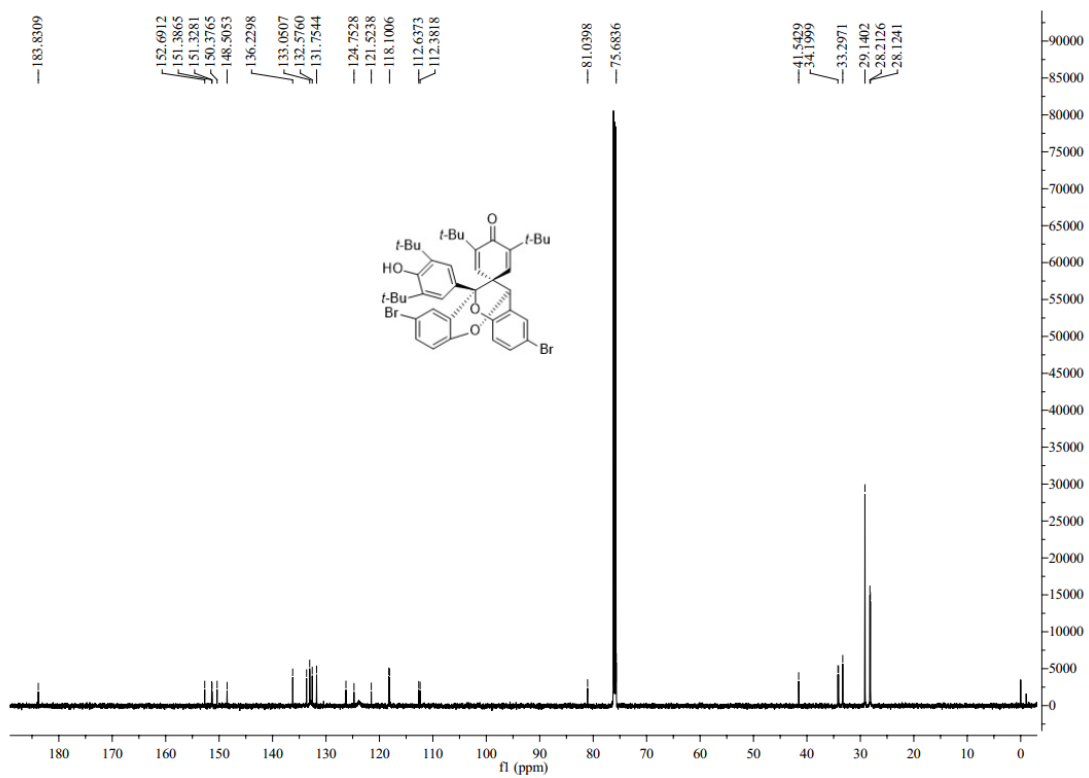

**<sup>13</sup>C NMR Spectrum of 2d (CDCl<sub>3</sub>, 600 MHz)**

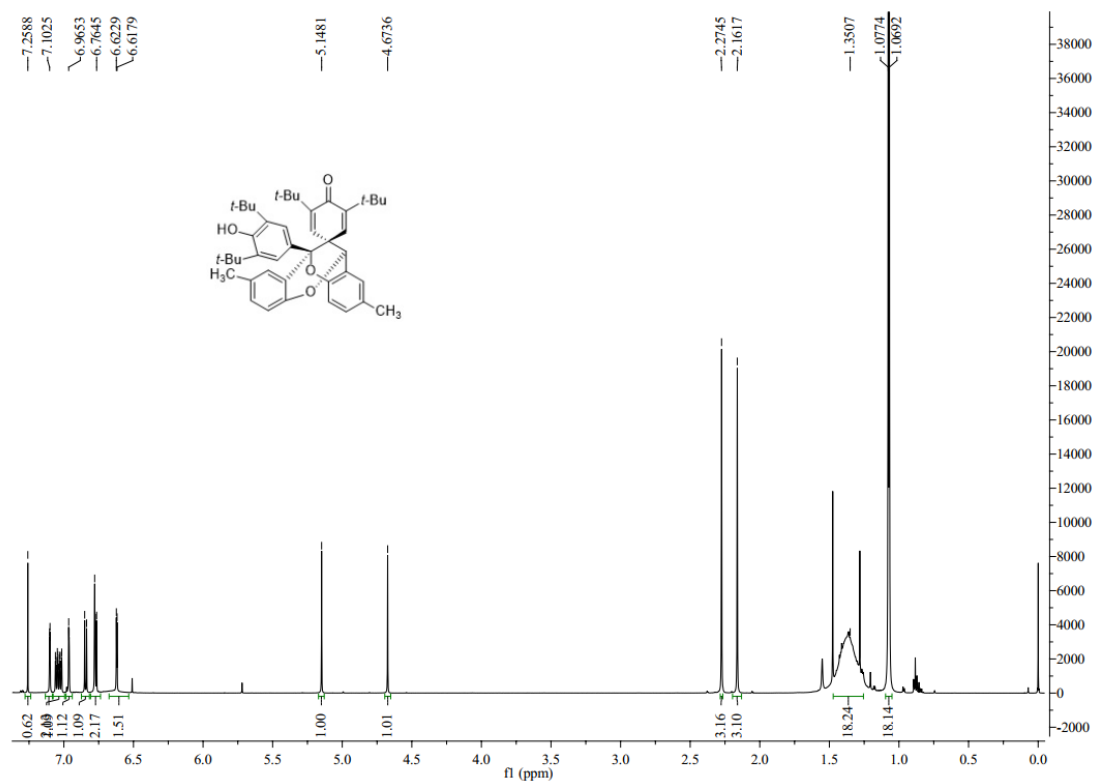

**<sup>1</sup>H NMR Spectrum of **2e** (CDCl<sub>3</sub>, 600 MHz)**

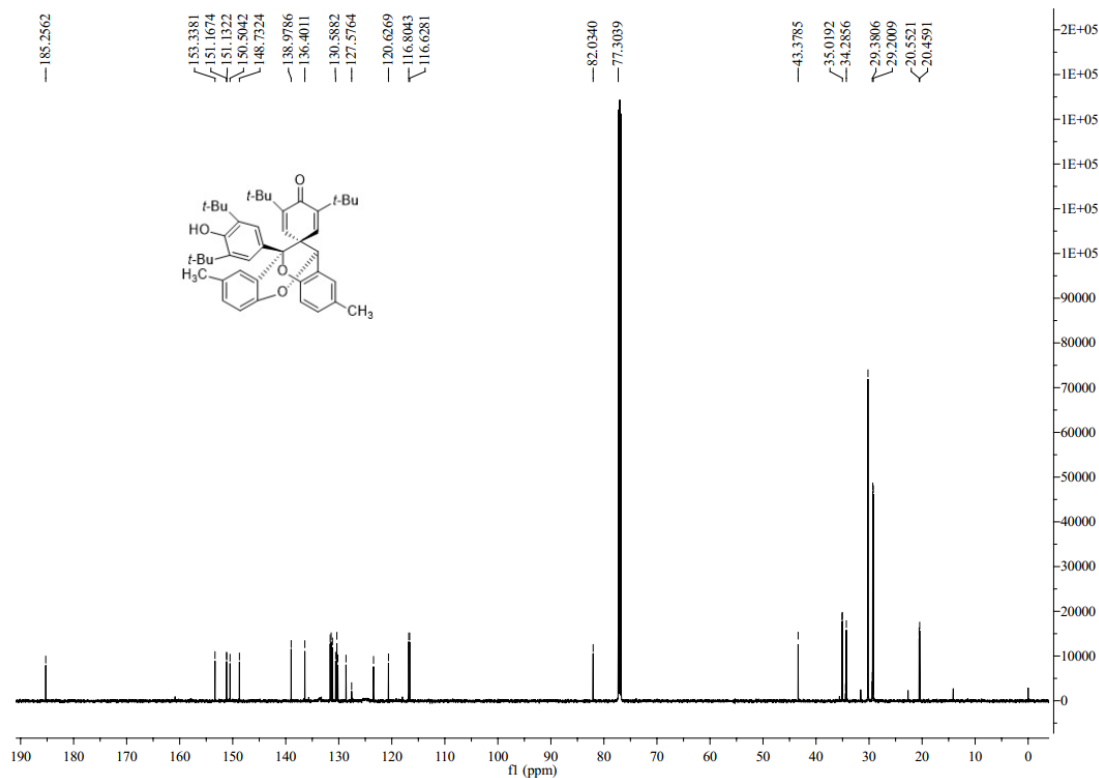

**<sup>13</sup>C NMR Spectrum of **2e** (CDCl<sub>3</sub>, 600 MHz)**

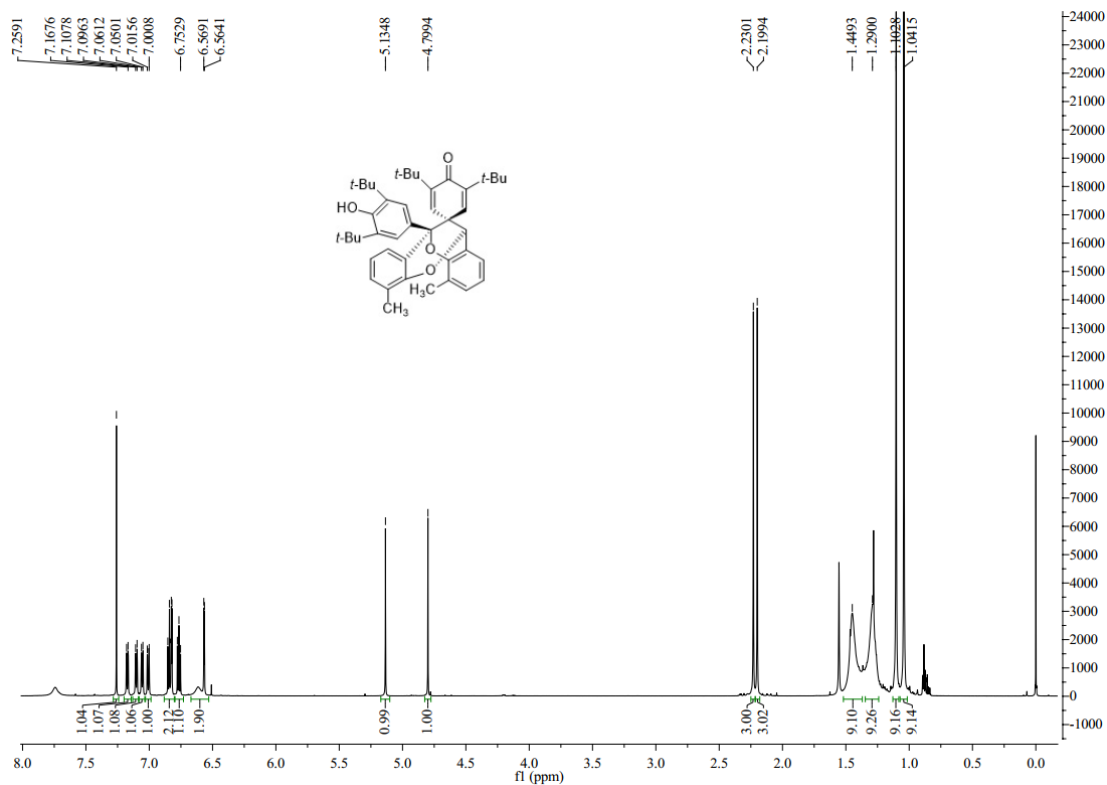

**<sup>1</sup>H NMR Spectrum of 2f (CDCl<sub>3</sub>, 600 MHz)**

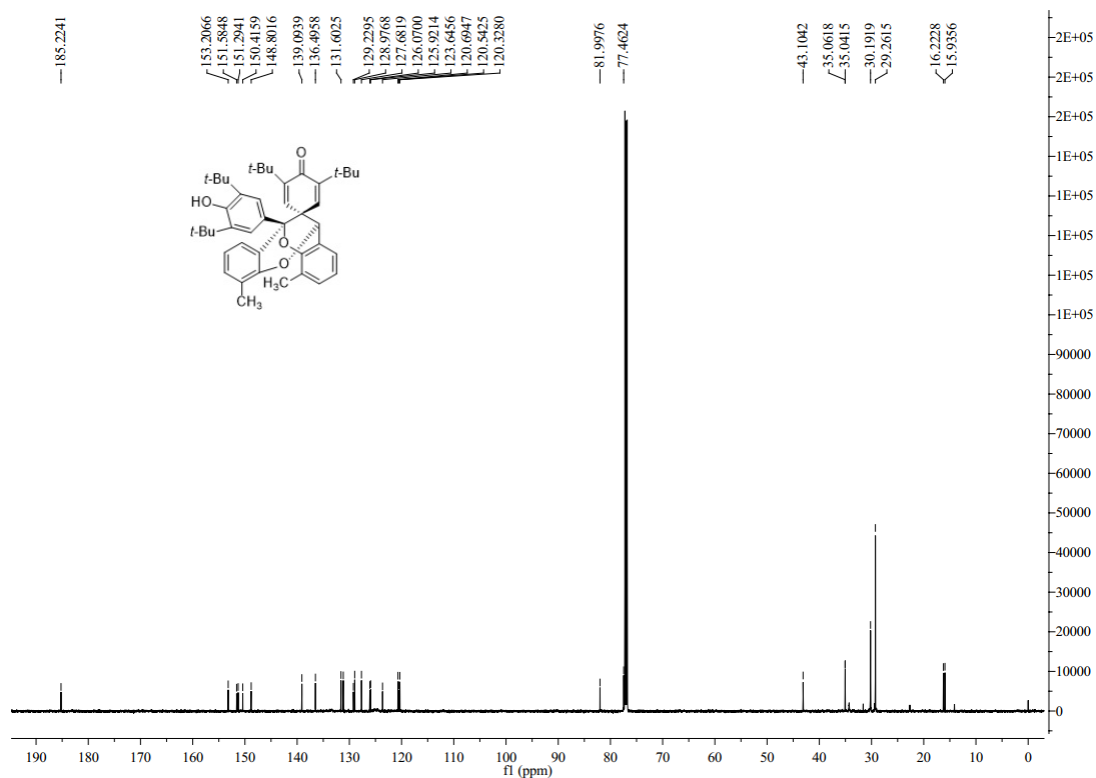

**<sup>13</sup>C NMR Spectrum of 2f (CDCl<sub>3</sub>, 600 MHz)**



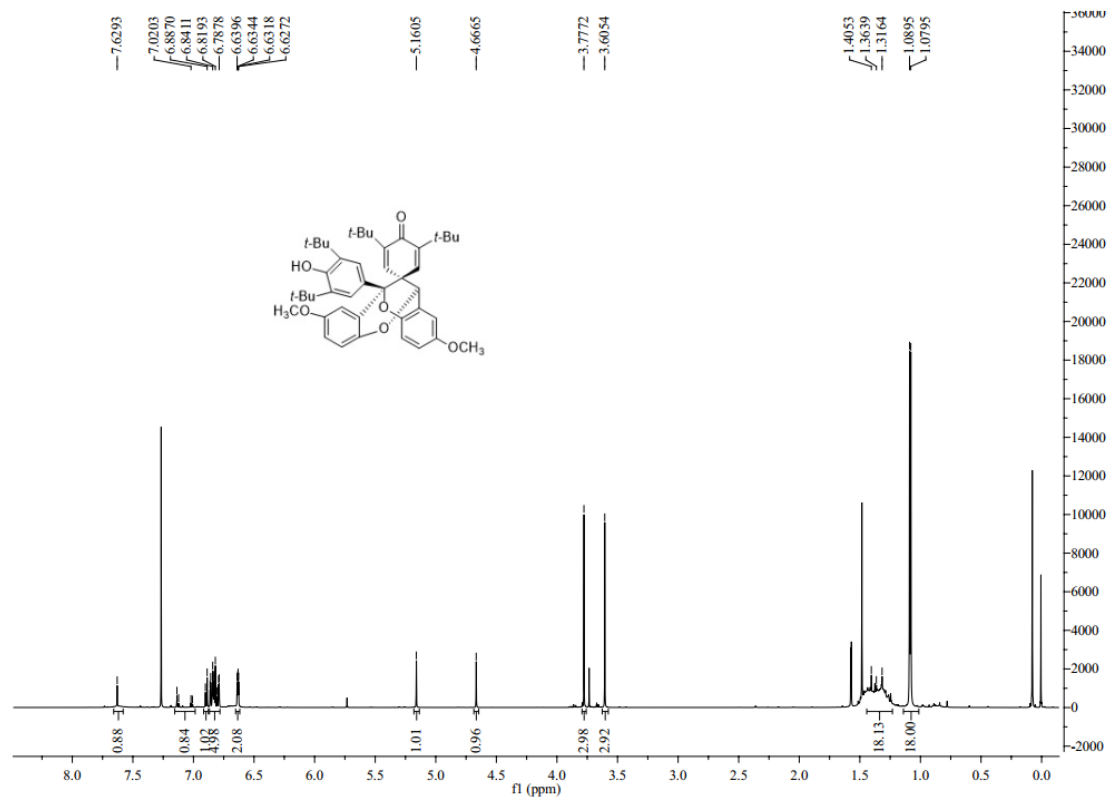

**<sup>1</sup>H NMR Spectrum of **2g** (CDCl<sub>3</sub>, 600 MHz)**

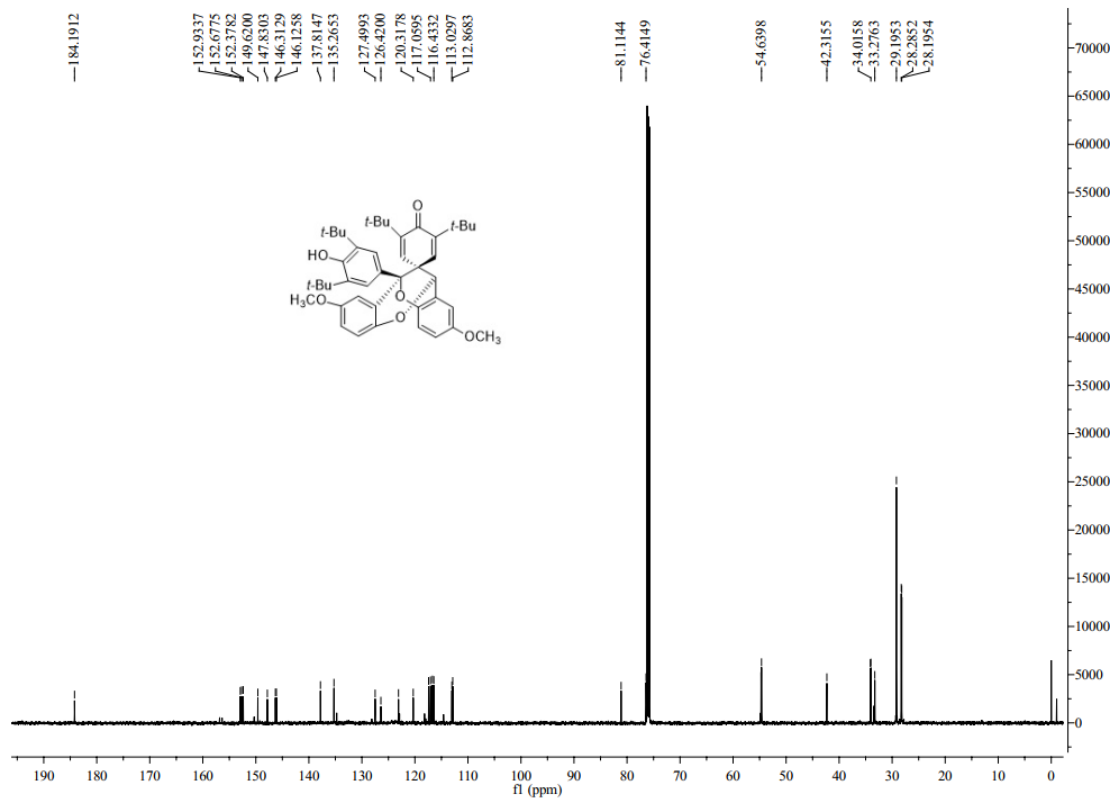

**<sup>13</sup>C NMR Spectrum of **2g** (CDCl<sub>3</sub>, 600 MHz)**

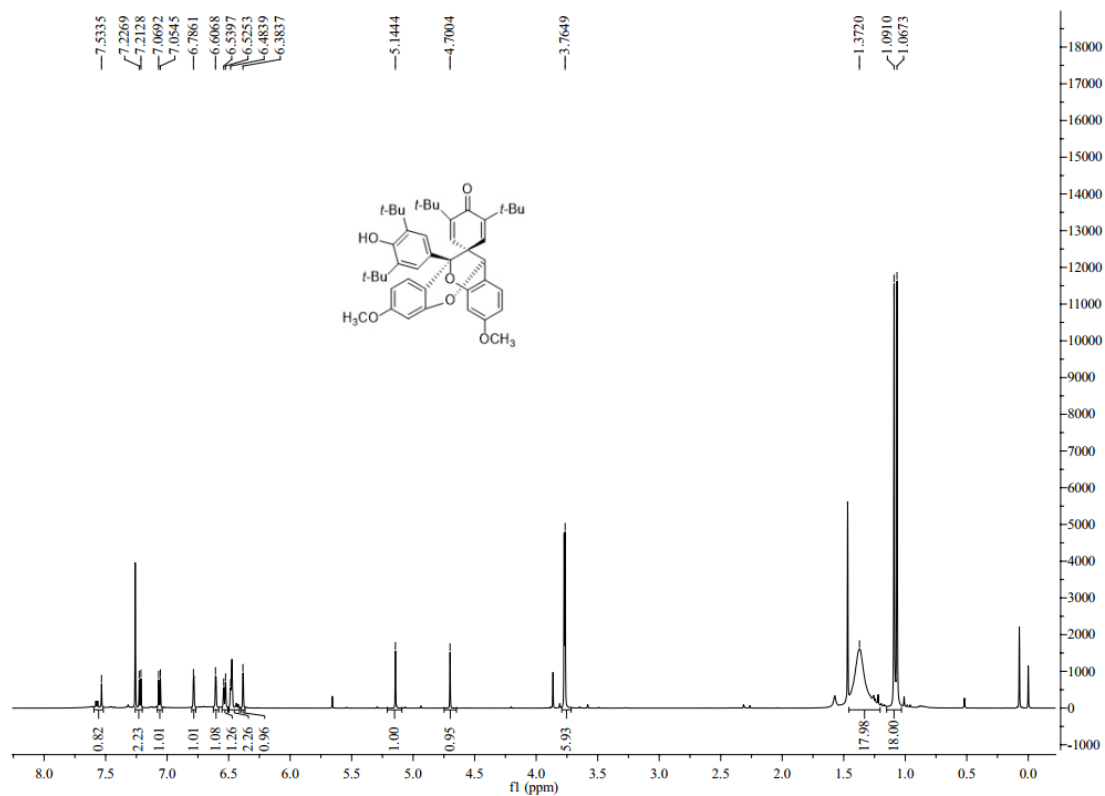

**<sup>1</sup>H NMR Spectrum of 2h (CDCl<sub>3</sub>, 600 MHz)**

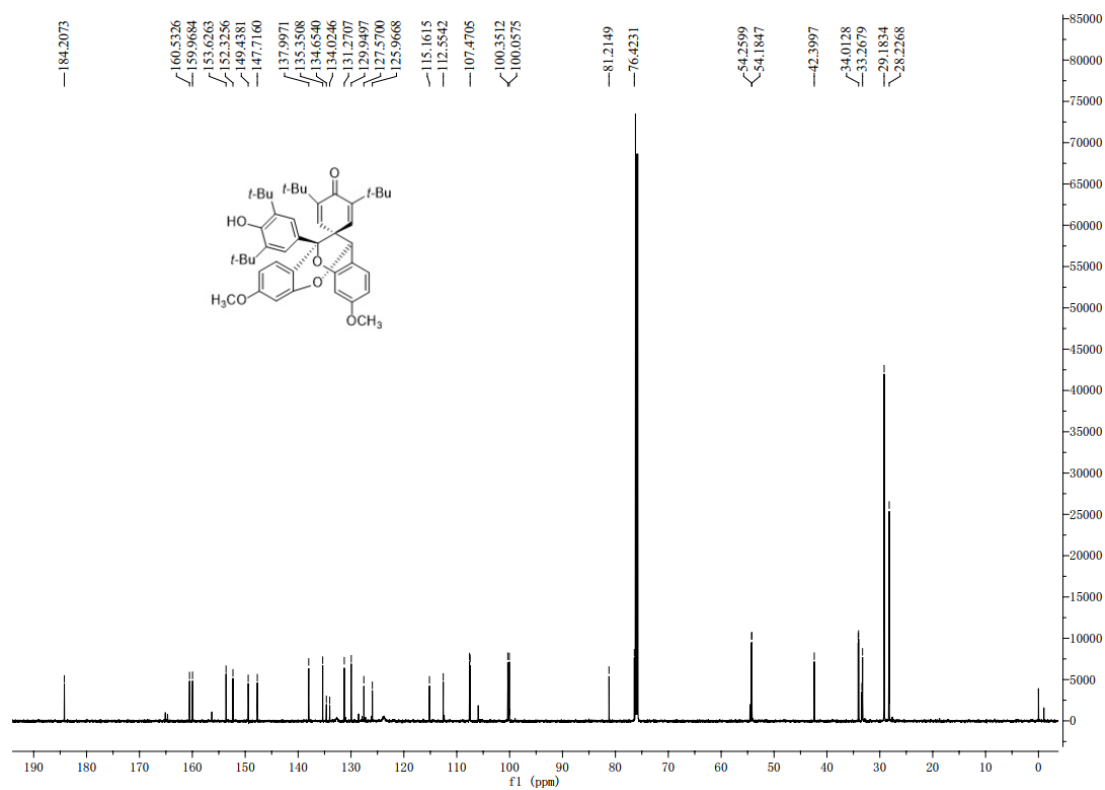

**<sup>13</sup>C NMR Spectrum of 2h (CDCl<sub>3</sub>, 600 MHz)**

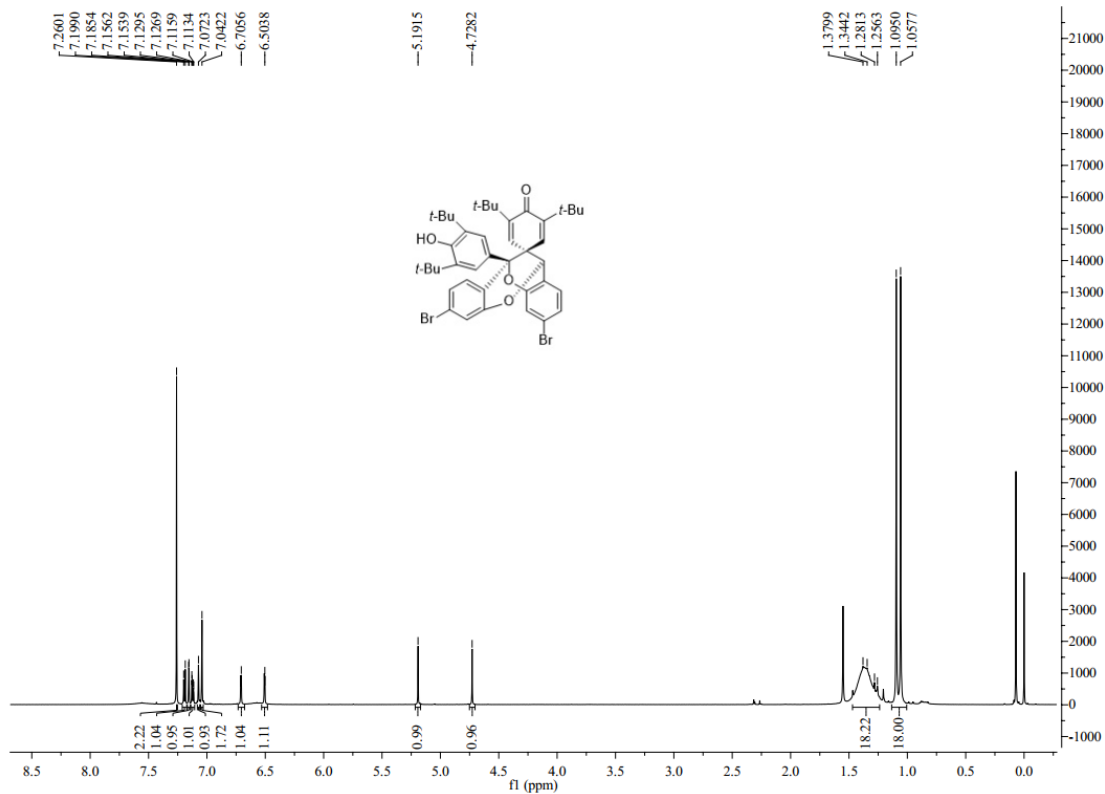

<sup>1</sup>H NMR Spectrum of **2i** (CDCl<sub>3</sub>, 600 MHz)

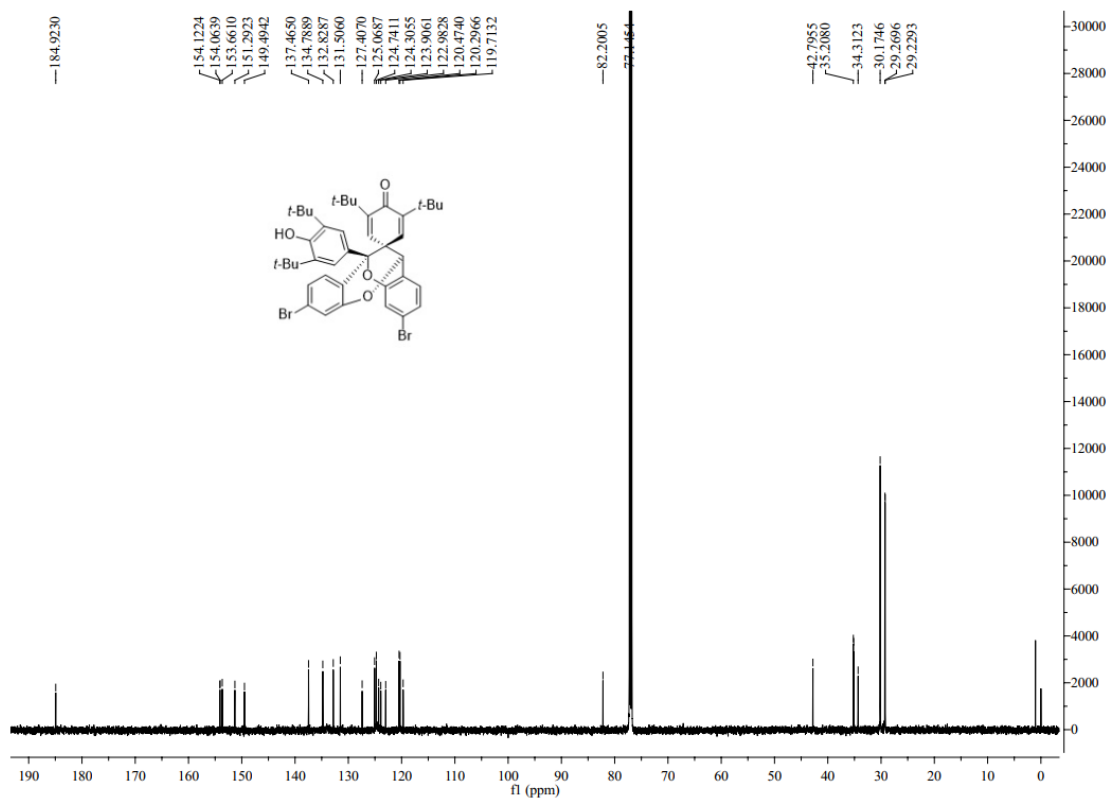

<sup>13</sup>C NMR Spectrum of **2i** (CDCl<sub>3</sub>, 600 MHz)

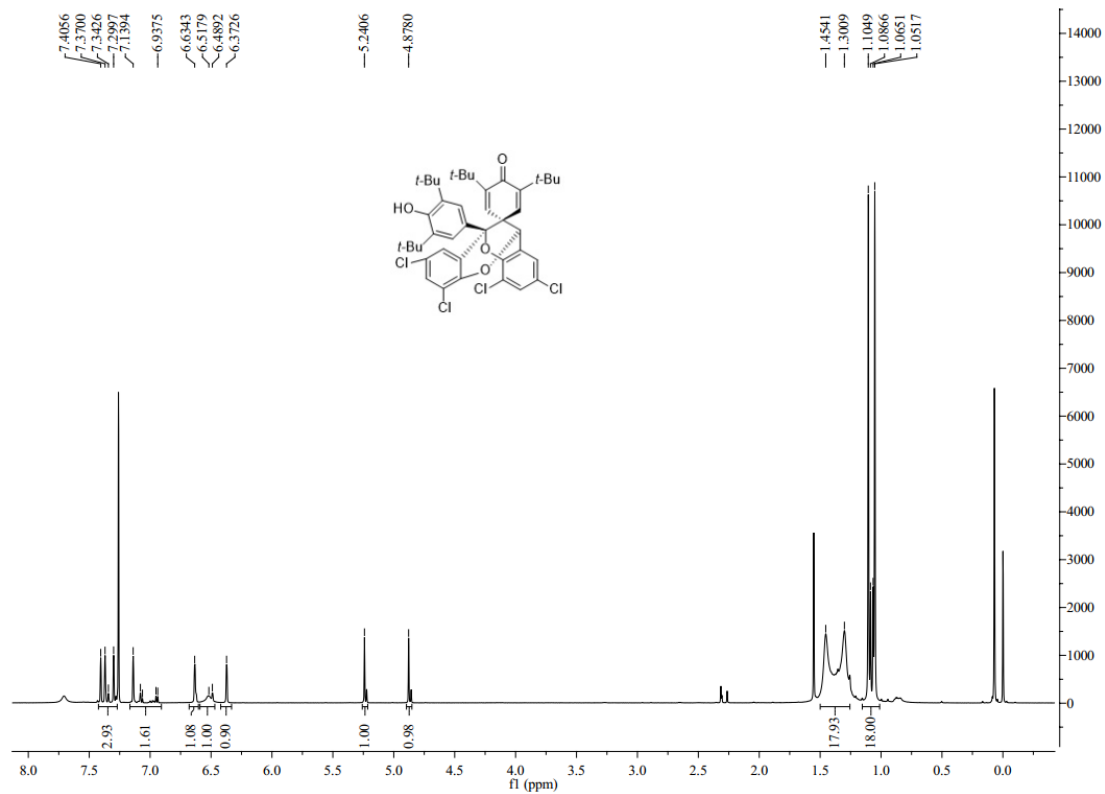

<sup>1</sup>H NMR Spectrum of **2j** (CDCl<sub>3</sub>, 600 MHz)

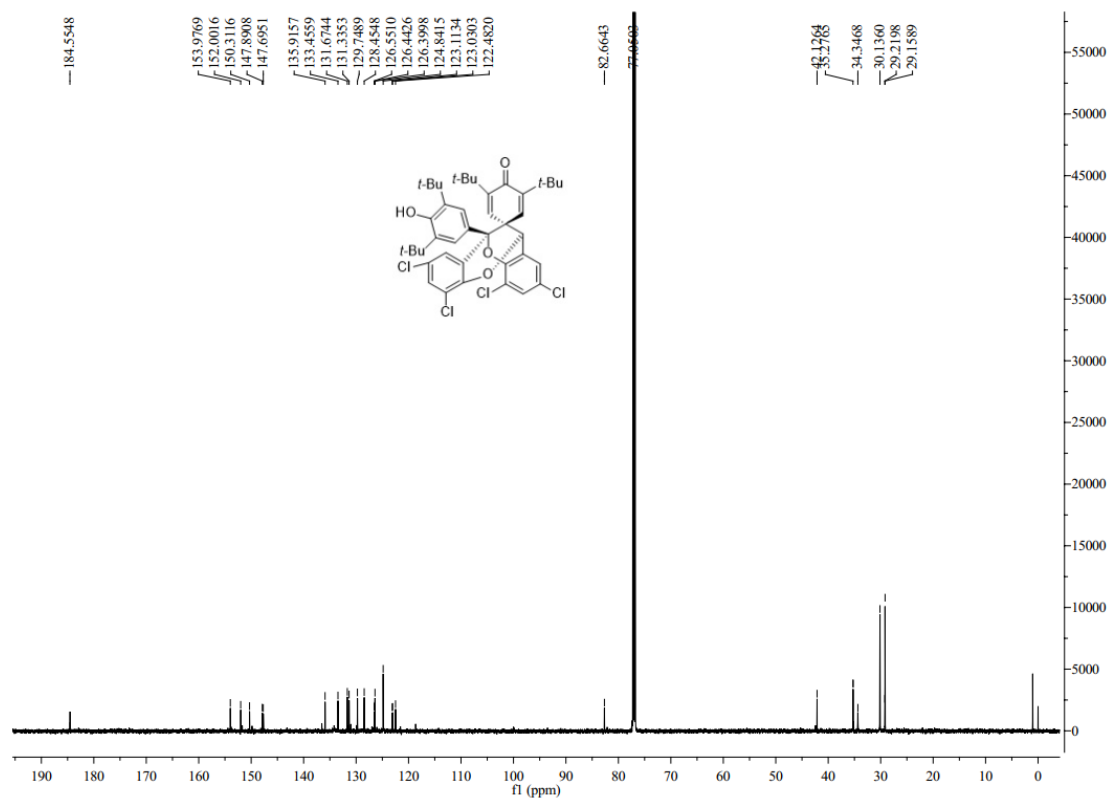

<sup>13</sup>C NMR Spectrum of **2j** (CDCl<sub>3</sub>, 600 MHz)

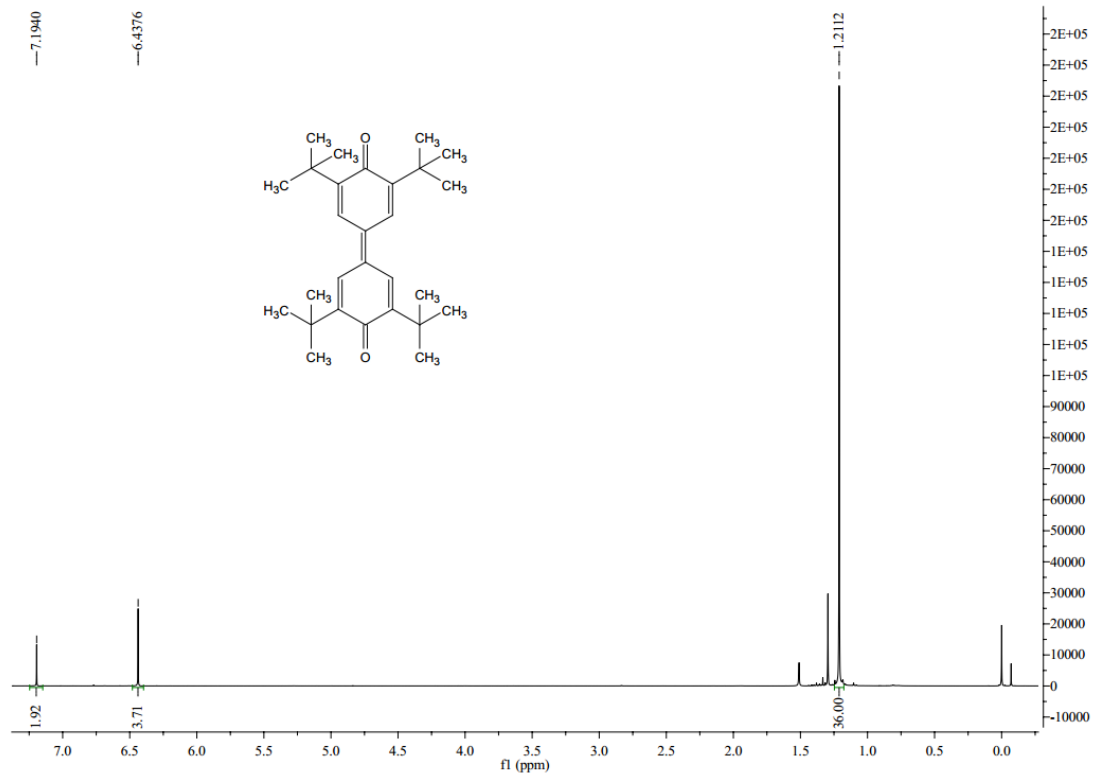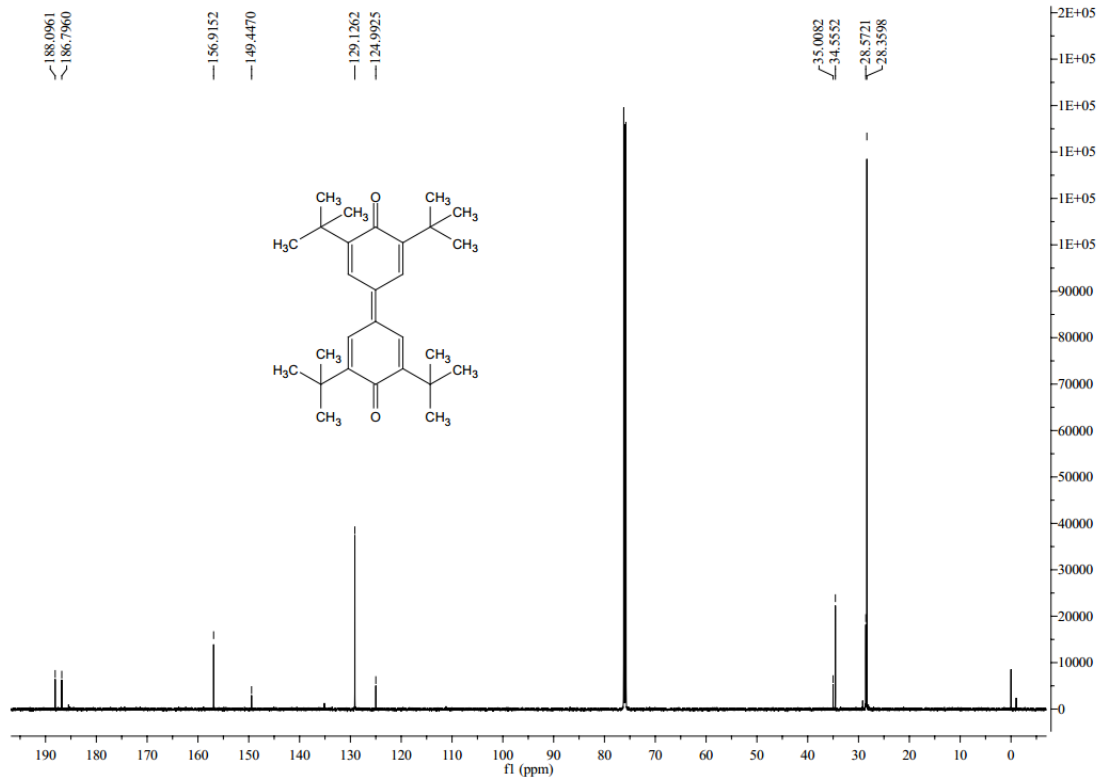

## 6. Single-Crystal X-ray Crystallography of Product 2a

Single-Crystal X-ray Crystallography of Product **2a** (CDCC number:1916739)

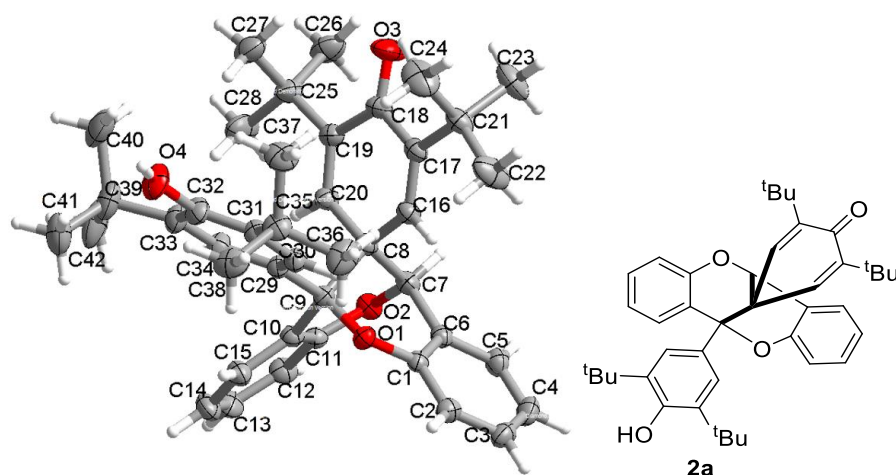

|                                    |                                                |                                                |              |
|------------------------------------|------------------------------------------------|------------------------------------------------|--------------|
| Bond precision:                    | C-C = 0.0033 Å                                 | Wavelength=1.54184                             |              |
| Cell:                              | a=15.9497(5)                                   | b=13.0829(4)                                   | c=17.7686(6) |
|                                    | alpha=90                                       | beta=94.929(3)                                 | gamma=90     |
| Temperature:                       | 293 K                                          |                                                |              |
|                                    | Calculated                                     | Reported                                       |              |
| Volume                             | 3694.0(2)                                      | 3694.0(2)                                      |              |
| Space group                        | P 21/n                                         | P 1 21/n 1                                     |              |
| Hall group                         | -P 2yn                                         | -P 2yn                                         |              |
| Moiety formula                     | C <sub>42</sub> H <sub>50</sub> O <sub>4</sub> | C <sub>42</sub> H <sub>50</sub> O <sub>4</sub> |              |
| Sum formula                        | C <sub>42</sub> H <sub>50</sub> O <sub>4</sub> | C <sub>42</sub> H <sub>50</sub> O <sub>4</sub> |              |
| Mr                                 | 618.82                                         | 618.82                                         |              |
| D <sub>x</sub> ,g cm <sup>-3</sup> | 1.113                                          | 1.113                                          |              |
| Z                                  | 4                                              | 4                                              |              |
| Mu (mm <sup>-1</sup> )             | 0.544                                          | 0.544                                          |              |
| F <sub>000</sub>                   | 1336.0                                         | 1336.0                                         |              |
| F <sub>000</sub> '                 | 1339.68                                        |                                                |              |
| h,k,lmax                           | 19,15,21                                       | 19,15,21                                       |              |
| Nref                               | 6598                                           | 6598                                           |              |
| Tmin,Tmax                          | 0.917,0.937                                    | 0.893,1.000                                    |              |
| Tmin'                              | 0.917                                          |                                                |              |

Correction method= # Reported T Limits: T<sub>min</sub>=0.893 T<sub>max</sub>=1.000

AbsCorr = MULTI-SCAN

Data completeness= 1.000

Theta(max)= 67.070

R(reflections)= 0.0542( 4903)

wR2(reflections)= 0.1571( 6598)

S = 1.031

Npar= 427

Single-Crystal X-ray Crystallography of Product **3** (CDCC number: 2167147)

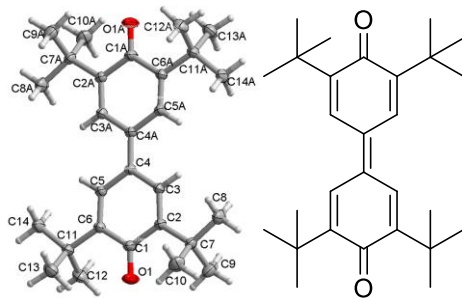

Bond precision:

C-C = 0.0029 Å

Wavelength=1.54184

Cell:

a=6.1016(6)

b=10.4244(9)

c=10.5390(8)

alpha=81.508(7)

beta=75.932(8)

gamma=81.583(8)

Temperature:

293 K

|                                     | Calculated                                     | Reported                                       |
|-------------------------------------|------------------------------------------------|------------------------------------------------|
| Volume                              | 638.83(10)                                     | 638.83(10)                                     |
| Space group                         | P -1                                           | P -1                                           |
| Hall group                          | -P 1                                           | -P 1                                           |
| Moiety formula                      | C <sub>28</sub> H <sub>40</sub> O <sub>2</sub> | C <sub>28</sub> H <sub>40</sub> O <sub>2</sub> |
| Sum formula                         | C <sub>28</sub> H <sub>40</sub> O <sub>2</sub> | C <sub>28</sub> H <sub>40</sub> O <sub>2</sub> |
| Mr                                  | 408.60                                         | 408.60                                         |
| D <sub>x</sub> , g cm <sup>-3</sup> | 1.062                                          | 1.062                                          |
| Z                                   | 1                                              | 1                                              |
| Mu (mm <sup>-1</sup> )              | 0.493                                          | 0.493                                          |
| F <sub>000</sub>                    | 224.0                                          | 224.0                                          |
| F <sub>000</sub> '                  | 224.58                                         |                                                |
| h,k,lmax                            | 7,12,12                                        | 7,12,12                                        |
| Nref                                | 2287                                           | 2279                                           |

Tmin,Tmax                      0.948,0.961                      0.784,1.000

Tmin'                              0.929

Correction method= # Reported T Limits: Tmin=0.784 Tmax=1.000

AbsCorr = MULTI-SCAN

Data completeness= 0.997

Theta(max)= 67.073

R(reflections)= 0.0527( 1616)

wR2(reflections)= 0.1576( 2279)

S = 1.032

Npar= 142
